# Supplementary material for: A glutathione-responsive PEGylated nanogel with doxorubicin-conjugation for cancer therapy
Source: Royal Society of Chemistry journal article supplement (doi:10.1039/d3tb01731a), 2023-01-01
Supplement: d3tb01731a1.pdf [file d3tb01731a1.pdf]

## **Glutathione-responsive PEGlyated nanogel with doxorubicin- conjugation for cancer therapy**

Shufen, Li<sup>a,b,†</sup>, Qiang Wang<sup>a,†</sup>, Xiao Duan<sup>a,c,†,\*</sup>, Zhen Pei<sup>b</sup>, Zhipeng He<sup>d</sup>, Wei Guo<sup>d,\*</sup>, Lingna Han<sup>b,\*</sup>

<sup>a</sup> School of Pharmacy, Changzhi Medical College, Changzhi 046000, China;

<sup>b</sup> Department of Physiology, Changzhi Medical College, Changzhi, 046000, China;

<sup>c</sup> The Stem Cell and Tissue Engineering Research Center, Changzhi Medical College, Changzhi, 046000, China;

<sup>d</sup> Department of Gastrointestinal Surgery, Heji Hospital Affiliated to Changzhi Medical College, Changzhi Medical College, Changzhi, 046000, China

\* Corresponding author: Xiao Duan, [duanxiao0211@czmc.edu.cn](mailto:duanxiao0211@czmc.edu.cn), Wei Guo: [uoei2@163.com](mailto:uoei2@163.com),

Lingna Han: [hanlingna@czmc.edu.cn](mailto:hanlingna@czmc.edu.cn)

† These authors contributed equally to this work

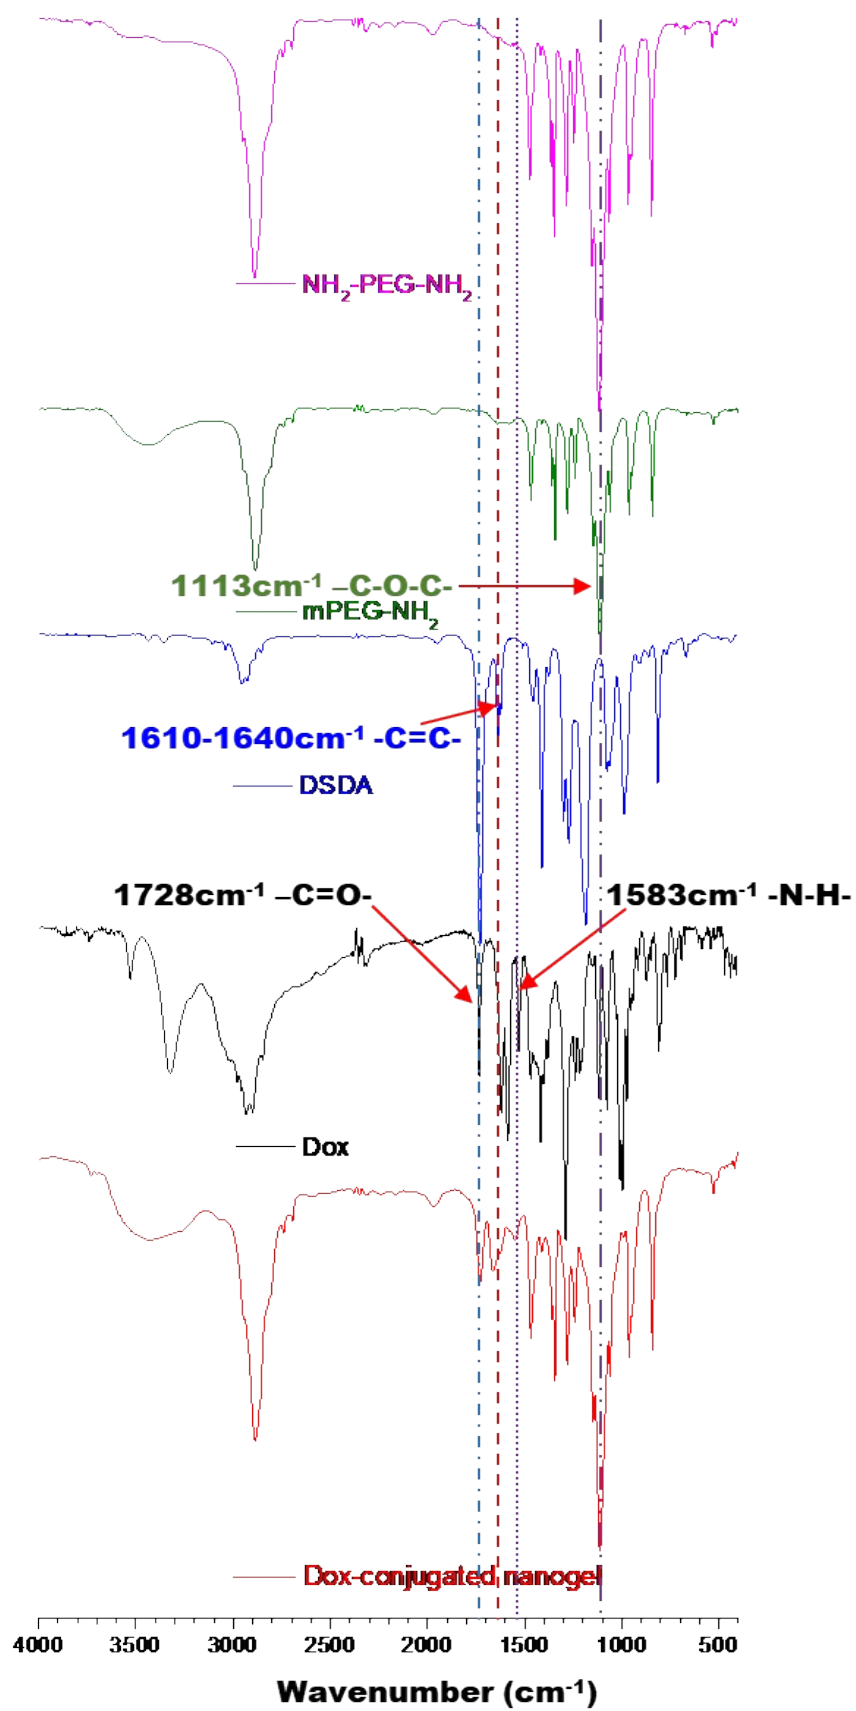

**Figure S1** The FT-IR spectra of NH<sub>2</sub>-PEG-NH<sub>2</sub>, mPEG-NH<sub>2</sub>, DSDA, Dox and Dox-conjugated nanogel.

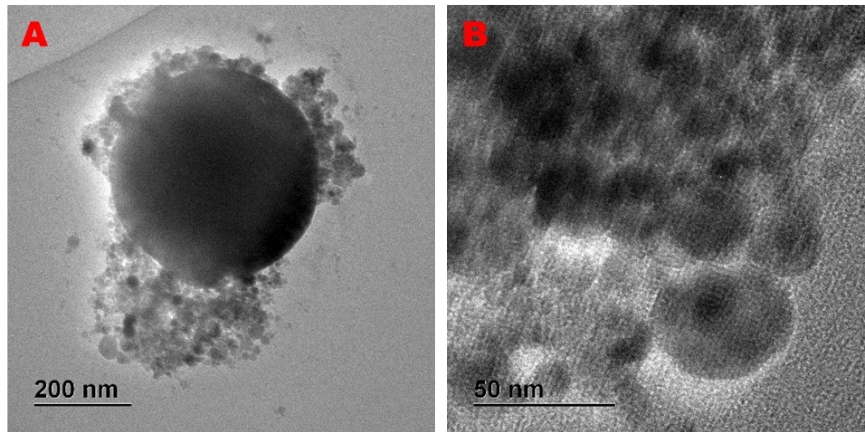

**Figure S2** The particle sizes of Dox-conjugated nanogels in PBS with 10 mg/mL GSH at the scale of (A) 200 nm and (B) 50 nm.

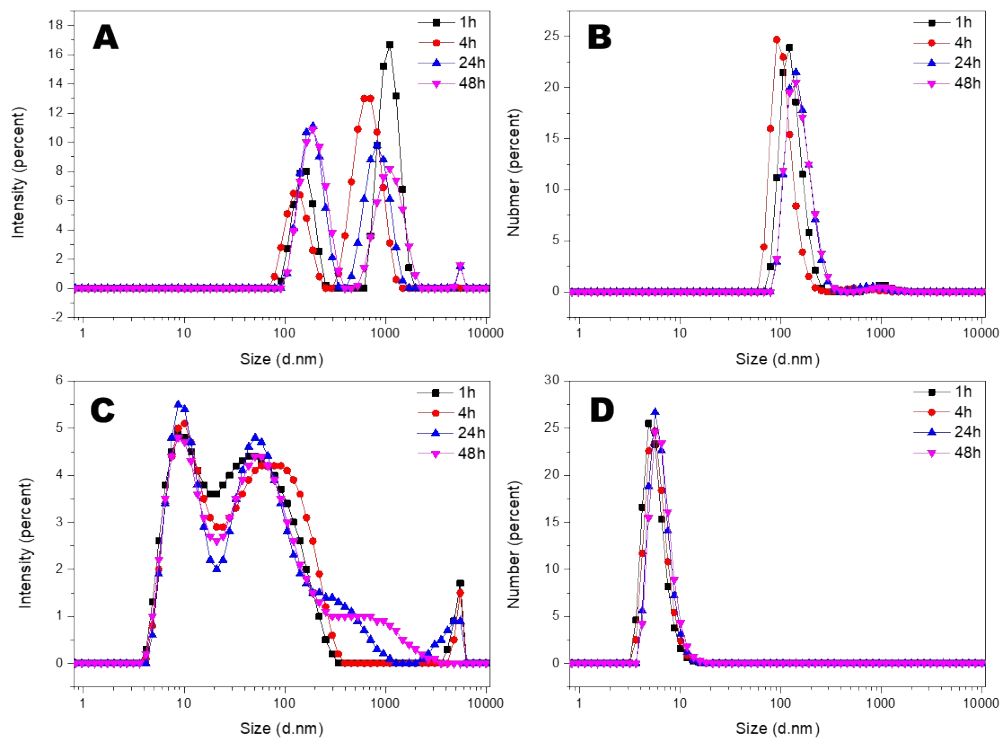

**Figure S3** The particle size of medium containing 10% FBS evaluated by intensity (A) and number (B) distribution without drugs or nanogels and the particle size of medium containing 10% FBS with Dox-conjugated nanogel evaluated by intensity (C) and number (D) distribution at 1 h, 4 h, 24 h and 48 h.

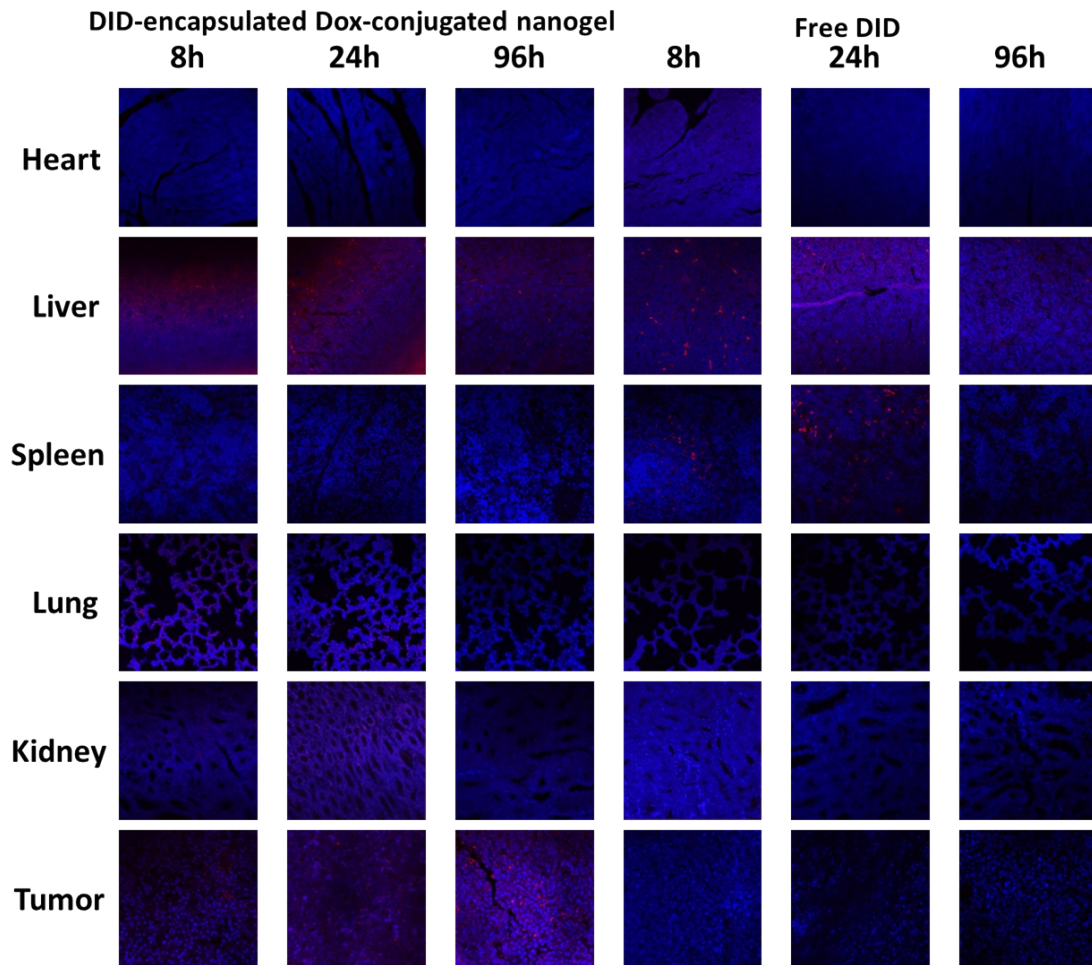

**Figure S4** The tissue sections observed by of heart, liver, spleen, lung, kidney and tumor treated by DID-encapsulated Dox-conjugated nanogel and free DID in 96 h.
